# Supplementary material
Source: PubMed Central journal article supplement (PMC7043674)
Supplement: JB.00720-19-s0001.pdf [file JB.00720-19-s0001.pdf]

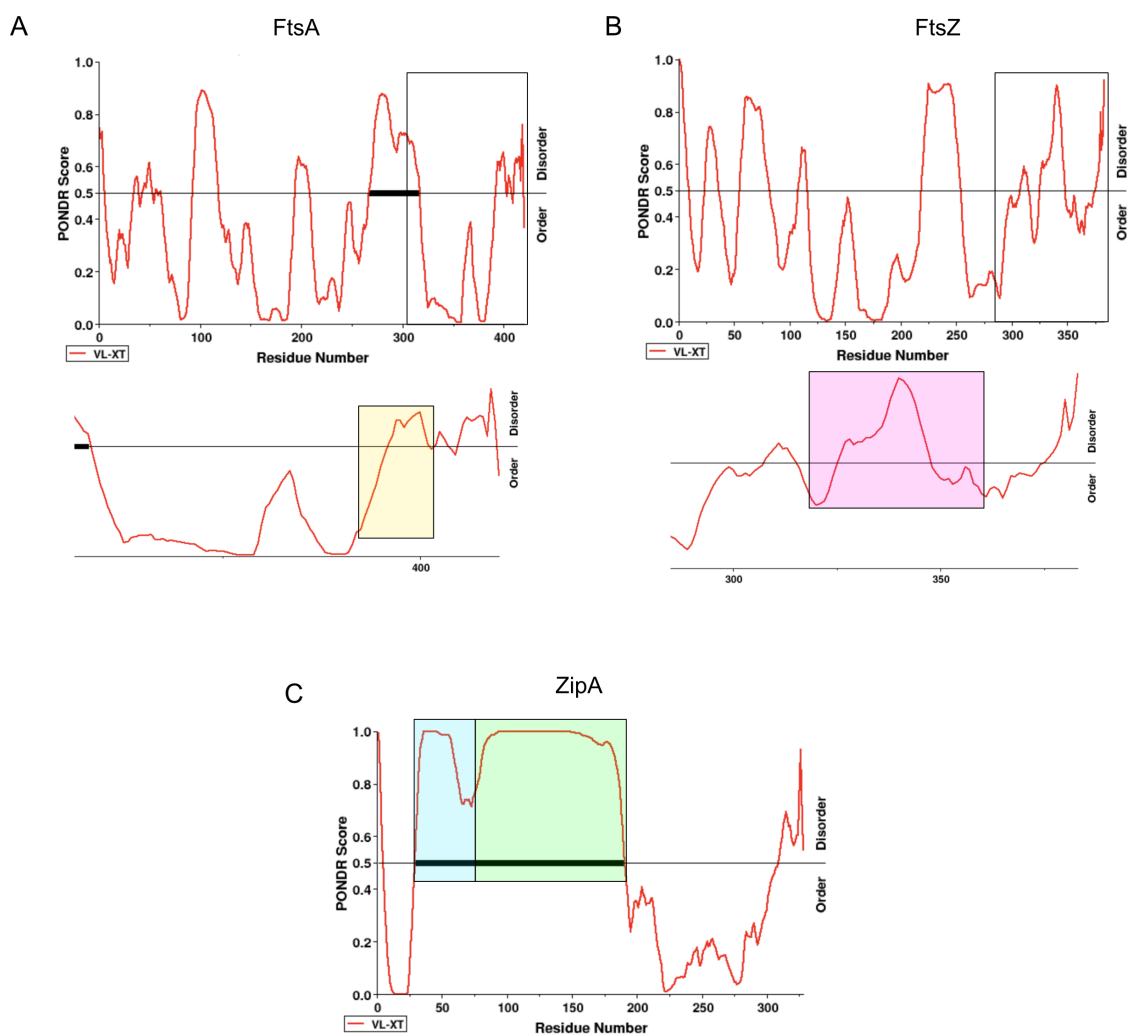

**Fig. S1. The FtsA, FtsZ and ZipA linkers all contain disordered regions.** (A) PONDR VL-XT (pondr.com) prediction for FtsA. The inset region is indicated in the black box. The linker region is indicated in the shaded yellow box on the inset. (B) PONDR VL-XT prediction for FtsZ. The inset region is indicated in the black box, and the linker region is indicated in the shaded pink box on the inset. (C) PONDR VL-XT prediction for ZipA. The blue and green boxes correspond to the charged and P/Q-rich domains of the linker, respectively. Residues with a score higher than 0.5 are predicted to be intrinsically disordered.



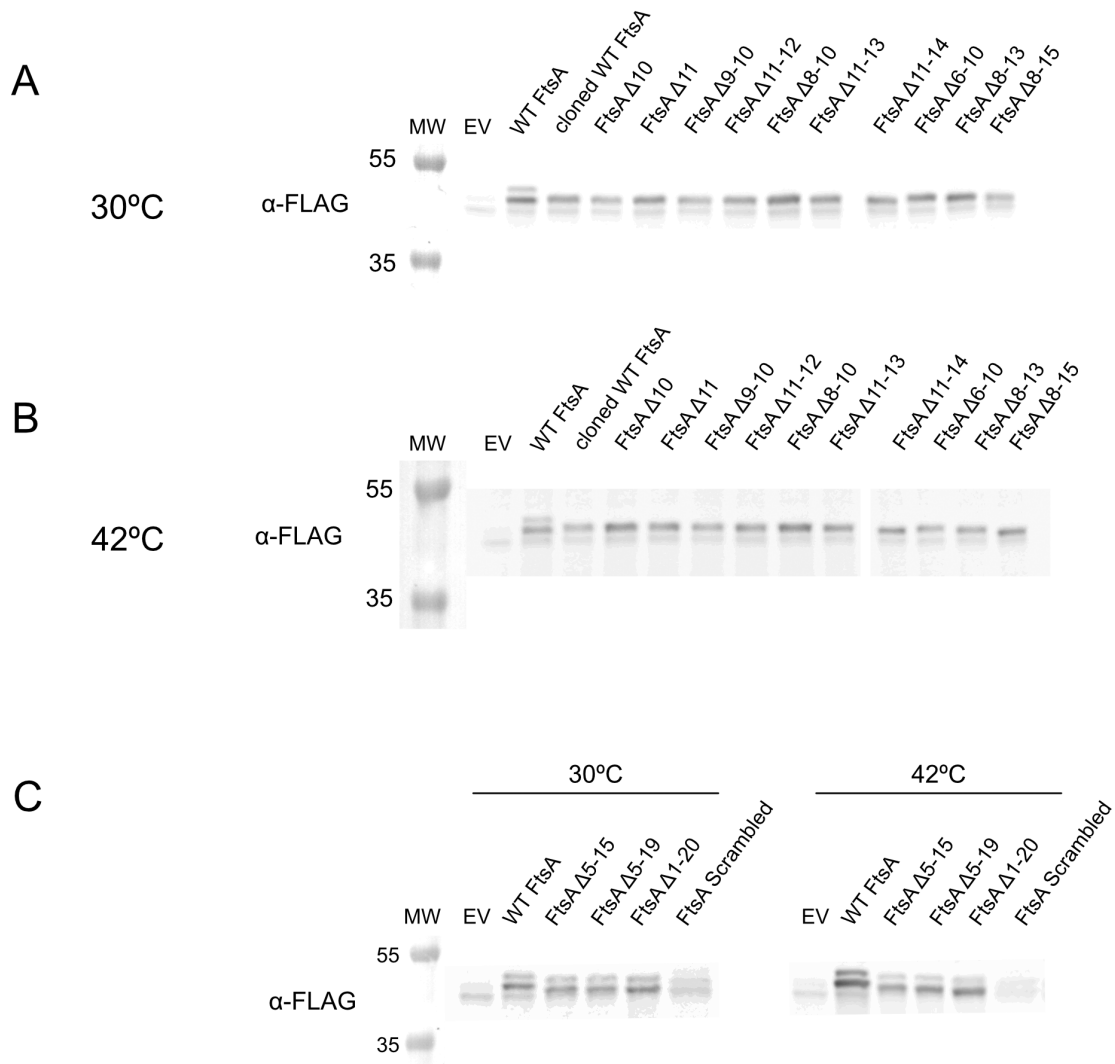

**Fig. S3. Immunoblots of plasmid-expressed FtsA linker mutant derivatives.** (A) Extracts of WM1074 cells producing various FLAG-FtsA derivatives from pDSW210F after induction with 50  $\mu$ M IPTG at 30°C were normalized for protein levels, subjected to SDS-PAGE, and Western blots were probed with anti-FLAG to show relative protein levels.. B) Same as (A), except cells were grown at 42°C. In both (A) and (B), samples were all run on one gel, but the last 4 lanes on the right are separated from the others to exclude a lane that had no sample run on the gel. (C) Same as (A) and (B), from additional FtsA derivatives grown at the indicated temperatures. The samples were all run on one gel, but the images are separated to exclude a blank lane.

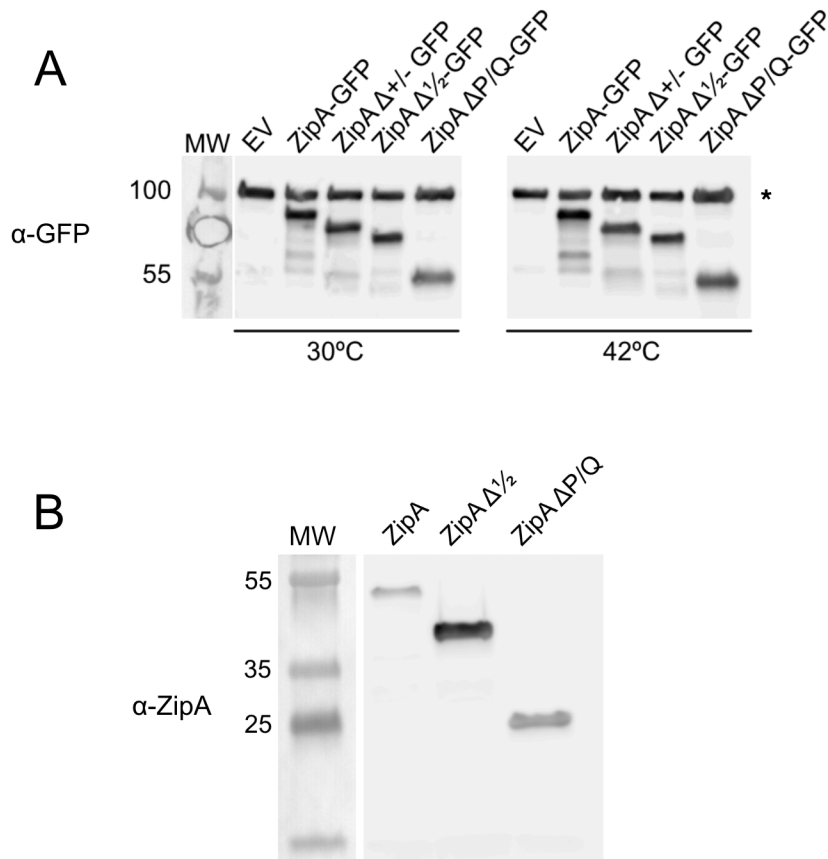

**Fig. S4. Immunoblots of ZipA linker derivatives.** (A) Extracts of WM1074 cells producing various ZipA-GFP derivatives from pDSW210 after induction with 50  $\mu$ M IPTG were normalized for protein levels, subjected to SDS-PAGE, and probed with anti-GFP on Western blots to show relative protein levels and sizes. As also shown in Fig. 3B, ZipA $\Delta$ P/Q-GFP migrates at the expected size, while all other ZipA derivatives migrate aberrantly slowly, between ~95 and 70 kDa. The asterisk denotes a nonspecific band at 100 kDa present in all the lanes. (B) Same as (A), except extracts were from cells with ZipA linker deletions replacing the native chromosomally-encoded *zipA*, and the blot was probed with anti-ZipA. As in (A), only ZipA $\Delta$ P/Q runs at the expected size.

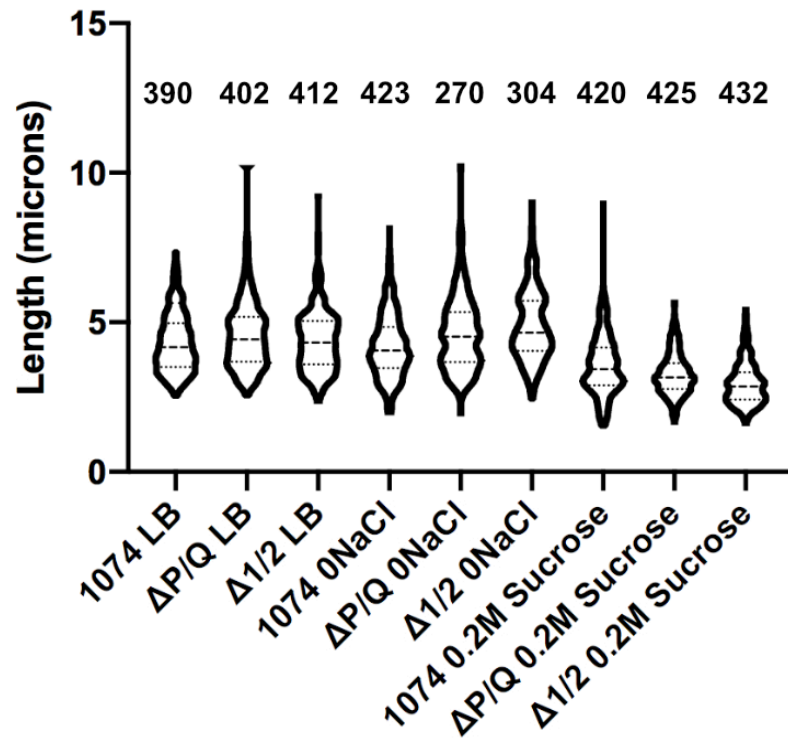

**Fig. S5. Cell length measurements of chromosomal ZipA linker mutants in various growth media.** Cell lengths were measured in ImageJ from phase contrast images of cells grown to an OD between 0.3-0.4. A violin plot was assembled in Prism8 by GraphPad. Numbers above each violin correspond to the number of cells measured for each strain in each condition. The thick dashed line in each represents the average measured cell length, with the thinner dashed lines representing the 1<sup>st</sup> and 3<sup>rd</sup> quartiles.

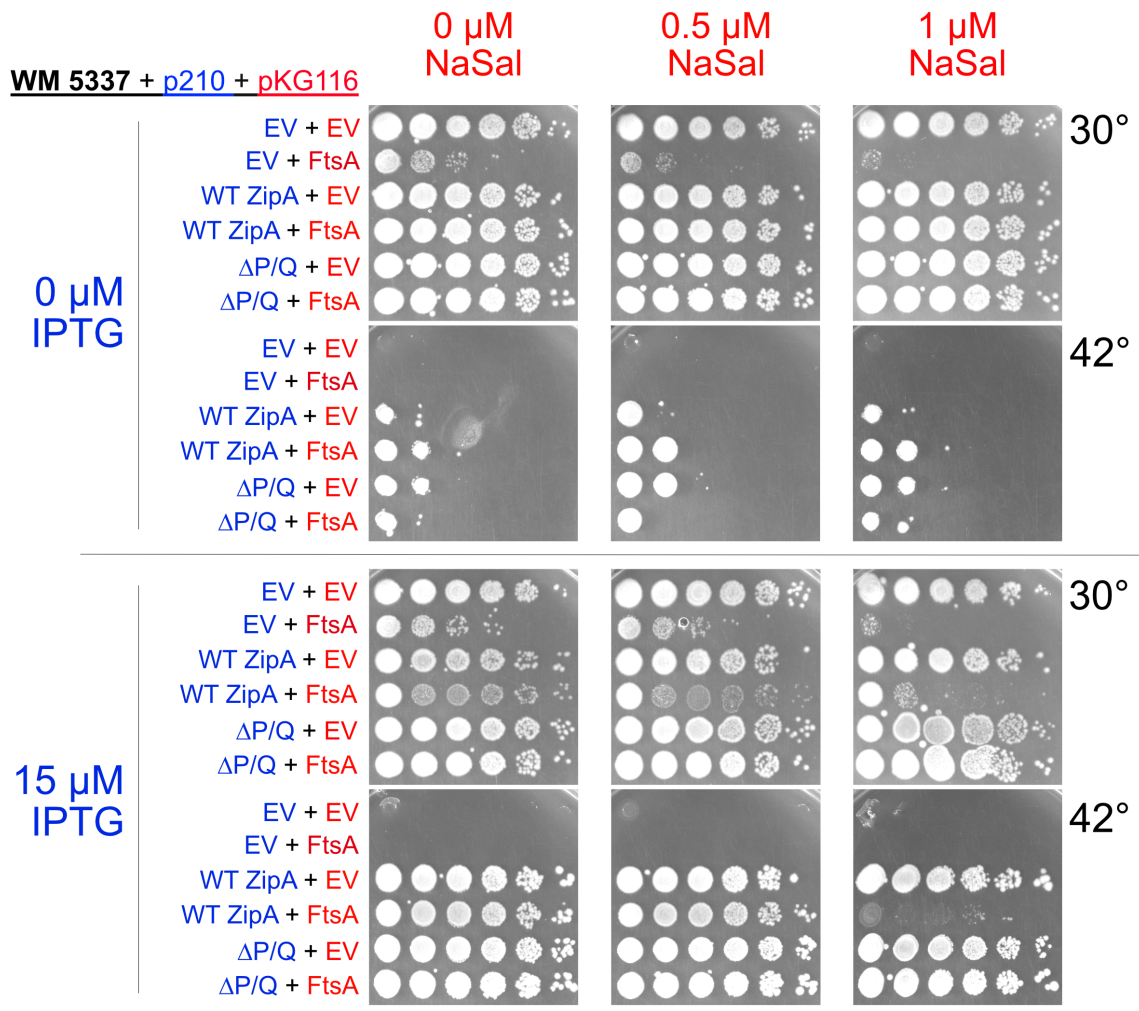

**Fig. S6. Overexpression of FtsA is less toxic in cells also overproducing ZipA $\Delta$ P/Q, but not WT ZipA.** WM 5337 (*zipA1*) cells cotransformed with pDSW210 derivatives expressing WT ZipA or ZipA $\Delta$ P/Q (labeled in blue) and either empty pKG116 vector or pKG116-FtsA (labeled in red) were serially-diluted 10-fold and spotted on LB plates with the indicated concentrations of IPTG (labeled in blue as it induces pDSW210 derivatives) and/or sodium salicylate (NaSal; labeled in red as it induces pKG116 derivatives) and incubated at 30°C or 42°C overnight. The asterisks indicate the rows with cells overexpressing both ZipA $\Delta$ P/Q and FtsA.

**Table S1. Oligonucleotide primers used in this study.**

| <b>Primer #</b> | <b>Sequence</b>                                                    | <b>Description</b>                                    |
|-----------------|--------------------------------------------------------------------|-------------------------------------------------------|
| 2280            | TCATGCCCGGCTAACGCTCAGGAGCATGAGGCTGCTCGTTTATATCCCCAGAACATCA         | ZipA $\Delta$ P/Q <i>ccdB:kan</i> forward             |
| 2281            | CGTTCATGATAATCACCGCTTCTTTGCGCTTCGGTTTATCATAGGAACTTCAAGATCCCCTTATTA | ZipA $\Delta$ P/Q <i>ccdB:kan</i> reverse             |
| 2196            | TCAGTTGGCTCGTGGATC                                                 | FtsA $\Delta$ 5-19 forward                            |
| 2197            | CTCTTTCCCATAGTGAAGC                                                | FtsA $\Delta$ 5-19 reverse                            |
| 2188            | GCATCAGTTGGCTCGTGG                                                 | FtsA $\Delta$ 5-15 forward                            |
| 2189            | ATGTGACTCTTTCCCATAGT                                               | FtsA $\Delta$ 5-15 reverse                            |
| 2190            | GATAAACCGAAGCGCAAAGAAG                                             | ZipA $\Delta$ PQ forward                              |
| 2191            | ACGAGCAGCCTCATGCTC                                                 | ZipA $\Delta$ PQ reverse                              |
| 2192            | CCGTCGCCGCAACACCAG                                                 | ZipA $\Delta$ +/- forward                             |
| 2193            | GCTGGTCCAGAAACCATGTACC                                             | ZipA $\Delta$ +/- reverse                             |
| 2194            | CAGCCGTTGCAGCAGCCA                                                 | ZipA $\Delta$ 1/2 forward                             |
| 2195            | GACATCCTCGTCATAAGAATCGTCGTC                                        | ZipA $\Delta$ 1/2 reverse                             |
| 2163            | GGCCATACAAAAGCGAAGTGGCGGAAGAAGGCTCGTGGATCAAGCGA                    | FtsA scrambled linker insertion forward               |
| 2164            | GCGGCTTTTCGTTTTTGCCACCAGCACCGCATAGTGAAGCAATCCCACCG                 | FtsA scrambled linker insertion reverse               |
| 2159            | GGCTCGTGGATCAAGCGA                                                 | FtsA $\Delta$ 1-20 forward                            |
| 2160            | ATAGTGAAGCAATCCCACCG                                               | FtsA $\Delta$ 1-20 reverse                            |
| 265             | TGCAGGATTTGCGTCTGATA                                               | Internal ZipA forward                                 |
| 2364            | CAGGAAAATTCTGCGTATTTTAC                                            | Forward primer for sequencing ZipA in chromosome      |
| 2365            | CGCGCAGTTCGCGCATCAG                                                | Reverse primer for sequencing ZipA in chromosome      |
| 2366            | TATATATCTAGATCAGGCGTTGGCGTCTTTGAC                                  | Internal ZipA reverse                                 |
| 1157            | CCGACATCATAACGGTTCTGGCA                                            | pDSW210 vector forward primer                         |
| 1158            | GCCATCTAATTCAACAAGAAGT                                             | pDSW210 vector reverse primer for ZipA-GFP fusions    |
| 1225            | TGCCGCCAGGCAAATTCTGTTTTATCAGAC                                     | pDSW210 vector reverse primer for FtsA linker mutants |
